# Supplementary material for: Prey selectivity and the effect of diet on growth and development of a dragonfly, Sympetrum sanguineum
Source: PeerJ. 2019 Nov 5;7:e7881. doi: 10.7717/peerj.7881 (PMC6839516; doi:10.7717/peerj.7881)
Supplement: Supplemental Information 1 — Each observation contains information about the number of Daphnia magna and Chironomous larvae offered as prey and the number of approaches towards each prey type, the number of attacks, and the number of succesfully captured prey. [file peerj-07-7881-s001.csv]

experiment_id	diet_conditioning	number_of_Chironomus	number_of_Daphnia	Daphnia_approaches	Daphnia_attacks	Daphnia_eaten	Chironomus_approaches	Chironomus_attacks	Chironomus_eaten
3	Daphnia	0	20	7	6	3	NA	NA	NA
7	Daphnia	0	20	11	11	9	NA	NA	NA
11	Daphnia	0	20	17	17	8	NA	NA	NA
15	Chironomus	0	20	1	1	1	NA	NA	NA
19	Chironomus	0	20	12	12	6	NA	NA	NA
23	Daphnia	0	20	10	10	5	NA	NA	NA
62	Chironomus	0	20	2	2	1	NA	NA	NA
67	Daphnia	0	20	4	4	4	NA	NA	NA
69	Chironomus	0	20	4	4	3	NA	NA	NA
76	Chironomus	0	20	13	13	4	NA	NA	NA
83	Daphnia	0	20	12	11	6	NA	NA	NA
91	Daphnia	0	20	18	15	9	NA	NA	NA
94	Daphnia	0	20	8	8	4	NA	NA	NA
104	Chironomus	0	20	5	5	2	NA	NA	NA
111	Chironomus	0	20	1	1	1	NA	NA	NA
119	Chironomus	0	20	44	44	4	NA	NA	NA
124	Chironomus	0	20	9	9	4	NA	NA	NA
26	Chironomus	4	16	4	4	3	0	0	0
30	Chironomus	4	16	15	14	11	1	1	1
33	Chironomus	4	16	13	13	4	0	0	0
36	Chironomus	4	16	18	16	9	0	0	0
40	Daphnia	4	16	16	15	9	0	0	0
46	Daphnia	4	16	12	12	6	1	1	1
61	Chironomus	4	16	2	2	1	0	0	0
65	Daphnia	4	16	3	1	1	2	2	2
72	Chironomus	4	16	7	7	5	0	0	0
80	Chironomus	4	16	13	11	5	0	0	0
84	Daphnia	4	16	0	0	0	2	2	2
86	Daphnia	4	16	4	2	1	1	1	1
92	Daphnia	4	16	3	3	1	9	9	2
101	Chironomus	4	16	12	5	0	1	1	1
105	Chironomus	4	16	3	3	3	0	0	0
107	Daphnia	4	16	3	3	2	0	0	0
112	Chironomus	4	16	1	1	1	3	3	3
121	Daphnia	4	16	0	0	0	4	4	3
50	Daphnia	7	13	6	5	3	0	0	0
51	Daphnia	7	13	10	8	5	0	0	0
54	Daphnia	7	13	3	3	3	0	0	0
55	Daphnia	7	13	10	8	7	1	1	1
57	Chironomus	7	13	3	3	2	1	1	1
58	Chironomus	7	13	3	3	3	3	3	1
66	Daphnia	7	13	2	0	0	2	2	2
68	Daphnia	7	13	8	8	2	0	0	0
70	Chironomus	7	13	6	6	4	1	0	0
75	Chironomus	7	13	9	9	5	1	1	1
78	Chironomus	7	13	8	7	4	1	1	1
87	Daphnia	7	13	18	17	7	3	2	2
88	Daphnia	7	13	5	5	3	1	1	1
95	Daphnia	7	13	3	3	3	1	1	1
98	Daphnia	7	13	0	0	0	7	7	3
113	Chironomus	7	13	8	8	4	3	3	1
116	Chironomus	7	13	2	2	1	3	2	1
1	Daphnia	10	10	3	1	1	3	3	2
4	Daphnia	10	10	1	1	1	3	3	3
5	Daphnia	10	10	8	3	2	1	0	0
8	Daphnia	10	10	10	10	2	1	1	1
9	Daphnia	10	10	8	6	3	3	2	2
12	Daphnia	10	10	1	1	1	1	1	1
13	Chironomus	10	10	12	11	5	0	0	0
16	Chironomus	10	10	3	3	1	1	1	1
17	Chironomus	10	10	17	15	7	0	0	0
20	Chironomus	10	10	6	3	3	0	0	0
21	Chironomus	10	10	7	7	3	0	0	0
24	Chironomus	10	10	0	0	0	2	2	2
90	Daphnia	10	10	3	2	2	1	1	1
100	Chironomus	10	10	0	0	0	2	1	1
103	Chironomus	10	10	5	3	1	2	1	1
108	Chironomus	10	10	1	1	0	0	0	0
120	Daphnia	10	10	0	0	0	10	9	3
122	Daphnia	10	10	0	0	0	5	5	4
123	Chironomus	10	10	1	1	1	0	0	0
27	Chironomus	13	7	3	3	2	1	1	1
31	Chironomus	13	7	1	1	1	1	1	1
37	Chironomus	13	7	2	2	1	1	1	1
41	Daphnia	13	7	10	8	5	3	1	1
43	Daphnia	13	7	1	1	1	0	0	0
47	Daphnia	13	7	4	4	4	1	0	0
48	Daphnia	13	7	2	1	1	4	2	2
49	Daphnia	13	7	0	0	0	5	5	2
52	Daphnia	13	7	5	4	2	3	2	1
53	Daphnia	13	7	1	1	0	3	3	2
56	Chironomus	13	7	8	6	3	0	0	0
73	Chironomus	13	7	4	4	4	1	1	1
79	Chironomus	13	7	7	5	3	1	1	1
82	Daphnia	13	7	2	0	0	5	4	2
97	Daphnia	13	7	5	5	2	2	2	1
109	Chironomus	13	7	0	0	0	6	5	4
110	Chironomus	13	7	0	0	0	5	5	4
114	Chironomus	13	7	5	5	3	1	1	1
117	Chironomus	13	7	0	0	0	3	3	2
25	Chironomus	16	4	3	3	1	1	1	1
28	Chironomus	16	4	1	1	1	1	1	1
29	Chironomus	16	4	3	3	1	1	1	1
32	Chironomus	16	4	4	3	1	0	0	0
34	Chironomus	16	4	5	5	5	0	0	0
35	Chironomus	16	4	2	2	2	0	0	0
38	Daphnia	16	4	5	5	0	3	1	1
39	Daphnia	16	4	5	5	3	0	0	0
42	Daphnia	16	4	0	0	0	2	2	2
44	Daphnia	16	4	2	1	1	2	2	2
45	Daphnia	16	4	0	0	0	2	2	2
81	Daphnia	16	4	1	1	0	3	2	2
96	Daphnia	16	4	2	2	2	0	0	0
99	Chironomus	16	4	5	5	3	0	0	0
102	Chironomus	16	4	1	1	1	1	1	0
2	Daphnia	20	0	NA	NA	NA	4	4	4
6	Daphnia	20	0	NA	NA	NA	2	2	2
10	Daphnia	20	0	NA	NA	NA	6	6	3
14	Chironomus	20	0	NA	NA	NA	4	2	2
18	Chironomus	20	0	NA	NA	NA	8	3	2
22	Daphnia	20	0	NA	NA	NA	3	3	3
59	Chironomus	20	0	NA	NA	NA	5	4	3
60	Chironomus	20	0	NA	NA	NA	7	6	3
63	Daphnia	20	0	NA	NA	NA	5	2	2
64	Daphnia	20	0	NA	NA	NA	6	6	4
71	Chironomus	20	0	NA	NA	NA	2	2	2
74	Chironomus	20	0	NA	NA	NA	1	1	1
77	Chironomus	20	0	NA	NA	NA	2	2	2
85	Daphnia	20	0	NA	NA	NA	1	1	1
89	Daphnia	20	0	NA	NA	NA	1	1	1
93	Daphnia	20	0	NA	NA	NA	6	4	1
106	Daphnia	20	0	NA	NA	NA	2	2	2
115	Chironomus	20	0	NA	NA	NA	2	2	2
118	Chironomus	20	0	NA	NA	NA	4	4	4
