# Supplementary material for: Prey selectivity and the effect of diet on growth and development of a dragonfly, Sympetrum sanguineum
Source: PeerJ. 2019 Nov 5;7:e7881. doi: 10.7717/peerj.7881 (PMC6839516; doi:10.7717/peerj.7881)
Supplement: Supplemental Information 2 — Information about the number of Daphnia magna and Chironomus larvae available and handling time for individual predation events are provided for each dragonfly larva identified by a unique ID. [file peerj-07-7881-s002.csv]

experiment_id	diet_conditioning	no_Chironomus	no_Daphnia	handling_time_Chironomus_seconds	handling_time_Daphnia_seconds
17	Chironomus	10	10		35.92
17	Chironomus	10	10		31.57
17	Chironomus	10	10		31.97
17	Chironomus	10	10		54.72
17	Chironomus	10	10		39.18
20	Chironomus	10	10	60.69	33.99
21	Chironomus	10	10		29.33
21	Chironomus	10	10		21.63
21	Chironomus	10	10		34.96
21	Chironomus	10	10		14.62
21	Chironomus	10	10		15.79
21	Chironomus	10	10		28.71
21	Chironomus	10	10		47.46
24	Chironomus	10	10		38.60
24	Chironomus	10	10		49.01
24	Chironomus	10	10		45.24
25	Chironomus	10	10		15.65
25	Chironomus	10	10		51.74
25	Chironomus	10	10		45.05
28	Chironomus	10	10	64.39
28	Chironomus	10	10	125.46
122	Chironomus	10	10	153.33
126	Chironomus	10	10	69.45	66.44
157	Chironomus	10	10		71.31
18	Chironomus	20	0	96.91
18	Chironomus	20	0	139.95
22	Chironomus	20	0	67.06
22	Chironomus	20	0	79.78
73	Chironomus	20	0	61.92
73	Chironomus	20	0	94.70
73	Chironomus	20	0	95.26
74	Chironomus	20	0	86.55
74	Chironomus	20	0	122.07
74	Chironomus	20	0	117.32
90	Chironomus	20	0	114.66
85	Chironomus	20	0	122.91
85	Chironomus	20	0	220.66
94	Chironomus	20	0	153.20
94	Chironomus	20	0	153.33
141	Chironomus	20	0	50.74
141	Chironomus	20	0	44.00
145	Chironomus	20	0	41.44
19	Chironomus	0	20		42.18
23	Chironomus	0	20		15.84
23	Chironomus	0	20		13.68
23	Chironomus	0	20		35.23
23	Chironomus	0	20		26.35
23	Chironomus	0	20		30.09
23	Chironomus	0	20		31.29
76	Chironomus	0	20		65.55
83	Chironomus	0	20		83.96
83	Chironomus	0	20		51.50
83	Chironomus	0	20		95.94
93	Chironomus	0	20		40.80
93	Chironomus	0	20		88.69
93	Chironomus	0	20		84.65
93	Chironomus	0	20		108.14
127	Chironomus	0	20		42.32
127	Chironomus	0	20		91.35
146	Chironomus	0	20		55.41
146	Chironomus	0	20		65.25
146	Chironomus	0	20		38.55
134	Chironomus	0	20		76.23
158	Chironomus	0	20		71.31
29	Chironomus	16	4	93.85	12.27
33	Chironomus	16	4	106.18	29.51
34	Chironomus	16	4	94.48	22.18
37	Chironomus	16	4		27.44
41	Chironomus	16	4		49.80
41	Chironomus	16	4		35.51
41	Chironomus	16	4		33.48
41	Chironomus	16	4		32.55
41	Chironomus	16	4		40.80
42	Chironomus	16	4		33.99
42	Chironomus	16	4		25.64
121	Chironomus	16	4		72.74
121	Chironomus	16	4		69.24
121	Chironomus	16	4		21.12
31	Chironomus	4	16		15.03
31	Chironomus	4	16		15.75
31	Chironomus	4	16		20.58
35	Chironomus	4	16	90.68	22.31
35	Chironomus	4	16		41.09
35	Chironomus	4	16		28.96
35	Chironomus	4	16		16.06
35	Chironomus	4	16		22.18
35	Chironomus	4	16		11.01
35	Chironomus	4	16		15.29
35	Chironomus	4	16		36.49
35	Chironomus	4	16		36.62
35	Chironomus	4	16		19.59
35	Chironomus	4	16		10.89
39	Chironomus	4	16		15.93
39	Chironomus	4	16		20.11
39	Chironomus	4	16		15.90
39	Chironomus	4	16		35.71
43	Chironomus	4	16		14.91
43	Chironomus	4	16		12.36
43	Chironomus	4	16		44.16
43	Chironomus	4	16		30.63
43	Chironomus	4	16		47.71
43	Chironomus	4	16		42.76
43	Chironomus	4	16		37.45
43	Chironomus	4	16		40.44
43	Chironomus	4	16		37.60
75	Chironomus	4	16		126.16
87	Chironomus	4	16		61.66
87	Chironomus	4	16		56.63
87	Chironomus	4	16		59.24
87	Chironomus	4	16		67.06
87	Chironomus	4	16		53.72
100	Chironomus	4	16		44.50
100	Chironomus	4	16		41.76
100	Chironomus	4	16		46.66
100	Chironomus	4	16		39.01
100	Chironomus	4	16		54.96
124	Chironomus	4	16	134.34
128	Chironomus	4	16		77.28
128	Chironomus	4	16		46.06
137	Chironomus	4	16	80.28	33.16
137	Chironomus	4	16	44.55
137	Chironomus	4	16	46.80
32	Chironomus	13	7	107.57	13.43
32	Chironomus	13	7		19.66
36	Chironomus	13	7	61.34	42.17
44	Chironomus	13	7	124.48	30.42
70	Chironomus	13	7		24.94
70	Chironomus	13	7		24.33
70	Chironomus	13	7		31.40
89	Chironomus	13	7	45.13	29.52
89	Chironomus	13	7		42.14
89	Chironomus	13	7		39.01
89	Chironomus	13	7		32.42
98	Chironomus	13	7	164.81	55.77
132	Chironomus	13	7	24.91
132	Chironomus	13	7	32.58
132	Chironomus	13	7	27.67
133	Chironomus	13	7	43.13
133	Chironomus	13	7	24.26
133	Chironomus	13	7	38.94
133	Chironomus	13	7	40.18
140	Chironomus	13	7		32.83
140	Chironomus	13	7		45.82
140	Chironomus	13	7		47.74
144	Chironomus	13	7	100.33
144	Chironomus	13	7	34.92
71	Chironomus	7	13		38.75
71	Chironomus	7	13		82.01
72	Chironomus	7	13	92.76	31.84
72	Chironomus	7	13		27.09
72	Chironomus	7	13		37.01
84	Chironomus	7	13		29.36
84	Chironomus	7	13		68.91
84	Chironomus	7	13		61.60
84	Chironomus	7	13		94.48
139	Chironomus	7	13	29.90	30.21
139	Chironomus	7	13		29.58
139	Chironomus	7	13		27.56
139	Chironomus	7	13		17.43
95	Chironomus	7	13	76.60	86.63
143	Chironomus	7	13	38.69	35.03
5	Daphnia	10	10	92.61	48.35
5	Daphnia	10	10	145.88
8	Daphnia	10	10	134.92	42.28
8	Daphnia	10	10	62.07
9	Daphnia	10	10		40.11
9	Daphnia	10	10		47.17
12	Daphnia	10	10	81.24	35.50
12	Daphnia	10	10		18.44
13	Daphnia	10	10	50.77	34.01
13	Daphnia	10	10	54.46	31.92
13	Daphnia	10	10		33.29
16	Daphnia	10	10	63.70	21.37
16	Daphnia	10	10	88.62
16	Daphnia	10	10	138.90
110	Daphnia	10	10	117.42	69.50
110	Daphnia	10	10		65.73
153	Daphnia	10	10	45.86
153	Daphnia	10	10	42.30
153	Daphnia	10	10	43.59
155	Daphnia	10	10	50.72
155	Daphnia	10	10	39.76
155	Daphnia	10	10	34.36
155	Daphnia	10	10	37.95
6	Daphnia	20	0	74.22
6	Daphnia	20	0	116.00
6	Daphnia	20	0	100.30
6	Daphnia	20	0	140.95
10	Daphnia	20	0	88.49
10	Daphnia	20	0	77.35
14	Daphnia	20	0	101.31
14	Daphnia	20	0	93.67
14	Daphnia	20	0	164.89
26	Daphnia	20	0	66.20
26	Daphnia	20	0	66.81
26	Daphnia	20	0	201.35
77	Daphnia	20	0	148.94
77	Daphnia	20	0	135.09
78	Daphnia	20	0	76.29
78	Daphnia	20	0	70.86
78	Daphnia	20	0	62.87
78	Daphnia	20	0	176.11
105	Daphnia	20	0	99.63
109	Daphnia	20	0	93.96
113	Daphnia	20	0	59.06
129	Daphnia	20	0	84.92
129	Daphnia	20	0	120.89
7	Daphnia	0	20		42.04
7	Daphnia	0	20		34.63
7	Daphnia	0	20		34.50
11	Daphnia	0	20		20.83
11	Daphnia	0	20		20.99
11	Daphnia	0	20		38.28
11	Daphnia	0	20		49.03
11	Daphnia	0	20		24.96
11	Daphnia	0	20		41.26
11	Daphnia	0	20		32.69
11	Daphnia	0	20		22.41
11	Daphnia	0	20		81.38
15	Daphnia	0	20		20.97
15	Daphnia	0	20		35.15
15	Daphnia	0	20		29.87
15	Daphnia	0	20		27.57
15	Daphnia	0	20		36.91
15	Daphnia	0	20		60.54
15	Daphnia	0	20		17.80
15	Daphnia	0	20		36.53
27	Daphnia	0	20		43.67
27	Daphnia	0	20		24.35
27	Daphnia	0	20		25.00
27	Daphnia	0	20		41.50
27	Daphnia	0	20		32.70
81	Daphnia	0	20		43.29
81	Daphnia	0	20		49.61
81	Daphnia	0	20		35.54
103	Daphnia	0	20		68.17
103	Daphnia	0	20		35.38
103	Daphnia	0	20		69.60
111	Daphnia	0	20		53.13
111	Daphnia	0	20		53.75
111	Daphnia	0	20		39.74
111	Daphnia	0	20		38.94
111	Daphnia	0	20		39.85
111	Daphnia	0	20		41.61
115	Daphnia	0	20		53.31
115	Daphnia	0	20		27.83
115	Daphnia	0	20		46.24
115	Daphnia	0	20		40.15
45	Daphnia	16	4	105.81
46	Daphnia	16	4		26.69
46	Daphnia	16	4		23.46
46	Daphnia	16	4		45.04
50	Daphnia	16	4	65.96
50	Daphnia	16	4	96.37
53	Daphnia	16	4	80.92	33.96
53	Daphnia	16	4	160.80
54	Daphnia	16	4	129.63
54	Daphnia	16	4	122.05
101	Daphnia	16	4	93.68
101	Daphnia	16	4	126.70
117	Daphnia	16	4	64.25
117	Daphnia	16	4	159.52
47	Daphnia	4	16		26.20
47	Daphnia	4	16		38.43
47	Daphnia	4	16		14.71
47	Daphnia	4	16		19.49
47	Daphnia	4	16		36.94
47	Daphnia	4	16		20.56
47	Daphnia	4	16		47.11
47	Daphnia	4	16		23.03
47	Daphnia	4	16		48.08
55	Daphnia	4	16	60.74	16.81
55	Daphnia	4	16		32.54
55	Daphnia	4	16		20.19
55	Daphnia	4	16		34.05
55	Daphnia	4	16		14.53
55	Daphnia	4	16		20.36
79	Daphnia	4	16	81.88
104	Daphnia	4	16	107.96
104	Daphnia	4	16	46.35
112	Daphnia	4	16		45.98
112	Daphnia	4	16		46.35
130	Daphnia	4	16		49.33
130	Daphnia	4	16		73.32
154	Daphnia	4	16	64.47
154	Daphnia	4	16	54.28
154	Daphnia	4	16	101.87
48	Daphnia	13	7	69.93	26.86
48	Daphnia	13	7		30.83
48	Daphnia	13	7		25.85
48	Daphnia	13	7		26.09
48	Daphnia	13	7		29.91
52	Daphnia	13	7	78.73
56	Daphnia	13	7		20.74
56	Daphnia	13	7		26.13
56	Daphnia	13	7		35.58
56	Daphnia	13	7		44.33
61	Daphnia	13	7	64.75	31.69
61	Daphnia	13	7	69.99
62	Daphnia	13	7	117.89
62	Daphnia	13	7	124.47
65	Daphnia	13	7	85.27	48.56
65	Daphnia	13	7		37.22
66	Daphnia	13	7	232.62
66	Daphnia	13	7	352.96
102	Daphnia	13	7	73.51
102	Daphnia	13	7	50.84
118	Daphnia	13	7	53.96	64.84
118	Daphnia	13	7		52.94
63	Daphnia	7	13		33.02
63	Daphnia	7	13		43.93
63	Daphnia	7	13		45.57
64	Daphnia	7	13		44.70
64	Daphnia	7	13		38.31
64	Daphnia	7	13		37.30
64	Daphnia	7	13		34.95
64	Daphnia	7	13		33.97
67	Daphnia	7	13		114.02
67	Daphnia	7	13		43.59
67	Daphnia	7	13		37.63
68	Daphnia	7	13	97.13	71.09
68	Daphnia	7	13		51.86
68	Daphnia	7	13		39.23
68	Daphnia	7	13		21.99
68	Daphnia	7	13		21.66
68	Daphnia	7	13		57.30
68	Daphnia	7	13		53.36
80	Daphnia	7	13	264.78
80	Daphnia	7	13	131.95
82	Daphnia	7	13		34.65
82	Daphnia	7	13		39.19
107	Daphnia	7	13	67.78	13.96
107	Daphnia	7	13	144.47	18.00
107	Daphnia	7	13		28.03
107	Daphnia	7	13		42.58
107	Daphnia	7	13		48.81
107	Daphnia	7	13		83.36
107	Daphnia	7	13		31.85
116	Daphnia	7	13	74.44	37.58
116	Daphnia	7	13		40.56
116	Daphnia	7	13		39.79
120	Daphnia	7	13	61.54
120	Daphnia	7	13	74.82
