# Supplementary material for: Prey selectivity and the effect of diet on growth and development of a dragonfly, Sympetrum sanguineum
Source: PeerJ. 2019 Nov 5;7:e7881. doi: 10.7717/peerj.7881 (PMC6839516; doi:10.7717/peerj.7881)
Supplement: Supplemental Information 3 — Each line contains information about the survival, body weight, body length, and head width of individual larvae of S. sanguineum, and the same data on the adults in individuals which successfully completed their development. [file peerj-07-7881-s003.csv]

ID	Start_of_the_diet_treatment	Diet	F1_date_of_measurements	F1_weight_g	F1_head_width_mm	F1_body_length_mm	date_of_ecdysis_into_F0	F0_date_of_measurements	F0_weight_g	F0_head_width_mm	F0_body_length_mm	duration_of_the_last_instar_days	date_of_death	imaginal_ecdysis_date	sex	viable_adult	adult_date_of_measurements	adult_weight_g	adult_head_width_mm	adult_body_length_mm	died
1	2016-05-28	Daphnia	2016-05-27	0.05866	3.752	10.702	2016-06-01	2016-06-04	0.13180	4.889	14.364	17	NA	2016-06-18	F	1	2016-06-21	0.0965	5.710	35.741	0
2	2016-05-28	Chironomus	2016-05-27	0.06372	3.876	10.644	2016-06-04	2016-06-07	0.17032	5.016	14.450	NA	2016-06-29	NA	NA	0	NA	NA	NA	NA	1
3	2016-05-28	mixed	NA	NA	NA	NA	2016-05-29	2016-06-02	0.14421	4.926	13.731	NA	2016-06-17	NA	NA	0	NA	NA	NA	NA	1
4	2016-05-28	Chironomus	NA	NA	NA	NA	2016-05-30	2016-06-02	0.12835	4.956	14.956	22	NA	2016-06-21	F	1	2016-06-24	0.09879	NA	NA	0
5	2016-05-28	Daphnia	2016-05-27	0.05988	3.811	11.153	2016-05-31	2016-06-03	0.12548	4.878	13.979	18	NA	2016-06-18	M	1	2016-06-21	0.08687	5.602	34.462	0
6	2016-05-28	mixed	2016-05-27	0.06127	3.844	10.793	2016-06-02	2016-06-05	0.15310	4.829	14.208	17	NA	2016-06-19	M	1	2016-06-22	0.09723	5.793	34.603	0
7	2016-05-28	Chironomus	2016-05-27	0.06620	3.889	10.812	2016-06-02	2016-06-05	0.15195	4.890	14.649	22	NA	2016-06-24	M	0	2016-06-27	0.10473	5.556	34.144	0
8	2016-05-28	mixed	2016-05-27	0.06617	3.873	10.875	2016-06-02	2016-06-05	0.15698	4.881	14.709	18	NA	2016-06-20	F	1	2016-06-23	0.10244	5.696	36.803	0
9	2016-05-28	Daphnia	2016-05-27	0.06749	3.851	10.925	2016-05-30	2016-06-02	0.14228	4.990	13.772	19	NA	2016-06-18	F	1	2016-06-21	0.09706	5.759	35.790	0
10	2016-05-28	Daphnia	2016-05-27	0.05731	3.952	10.591	2016-06-05	2016-06-08	0.15378	5.041	14.492	19	2016-06-24	2016-06-24	NA	0	NA	NA	NA	NA	1
11	2016-05-28	Chironomus	2016-05-27	0.06751	3.910	10.945	2016-06-01	2016-06-04	0.14661	4.910	13.827	21	2016-06-22	2016-06-22	M	0	NA	NA	NA	NA	1
12	2016-05-28	mixed	2016-05-27	0.06830	3.871	10.713	2016-06-02	2016-06-05	0.15105	4.866	14.213	18	NA	2016-06-20	M	1	2016-06-23	0.10663	5.805	34.304	0
13	2016-05-28	Daphnia	2016-05-27	0.05950	3.901	10.819	2016-06-01	2016-06-04	0.14128	4.868	14.627	20	NA	2016-06-21	M	1	2016-06-24	0.0906	5.638	34.052	0
14	2016-05-28	Chironomus	2016-05-27	0.06600	3.966	10.836	2016-06-04	2016-06-07	0.15245	5.014	14.012	26	2016-06-30	2016-06-30	NA	0	NA	NA	NA	NA	1
15	2016-05-28	Chironomus	NA	NA	NA	NA	2016-05-29	2016-06-02	0.15085	4.875	14.151	21	NA	2016-06-19	F	1	2016-06-22	0.09675	5.497	31.753	0
16	2016-05-28	Daphnia	2016-05-27	0.05547	3.687	10.218	2016-06-04	2016-06-07	0.14137	4.858	14.060	19	NA	2016-06-23	F	1	2016-06-28	0.09121	5.500	34.928	0
17	2016-05-28	mixed	2016-05-27	0.05473	3.852	10.797	2016-06-04	2016-06-07	0.16045	5.025	14.602	NA	2016-06-26	NA	NA	0	NA	NA	NA	NA	1
18	2016-05-28	Chironomus	2016-05-27	0.05094	3.786	10.105	2016-06-07	2016-06-10	0.11881	4.698	13.494	NA	2016-06-24	NA	NA	0	NA	NA	NA	NA	1
19	2016-05-28	mixed	2016-06-02	0.06752	3.740	10.828	2016-06-07	NA	NA	NA	NA	NA	2016-06-10	NA	NA	0	NA	NA	NA	NA	1
20	2016-05-28	Daphnia	2016-05-27	0.05212	3.673	10.674	2016-06-05	2016-06-08	0.15254	4.816	15.226	17	NA	2016-06-22	M	1	2016-06-28	0.09127	5.707	35.253	0
21	2016-05-28	Daphnia	2016-06-02	0.07801	3.883	11.110	2016-06-05	2016-06-08	0.16585	4.976	14.796	18	NA	2016-06-23	NA	1	NA	NA	NA	NA	0
22	2016-05-28	mixed	2016-05-27	0.07183	3.832	10.868	2016-05-31	2016-06-03	0.14600	4.898	14.427	19	NA	2016-06-19	M	1	2016-06-22	0.1062	5.685	34.533	0
23	2016-05-28	Chironomus	NA	NA	NA	NA	2016-05-29	2016-06-02	0.13120	4.895	13.283	25	NA	2016-06-23	M	0	NA	NA	NA	NA	0
24	2016-05-28	Daphnia	2016-05-27	0.06172	3.794	10.802	2016-06-01	2016-06-04	0.13312	4.731	13.974	19	NA	2016-06-20	M	1	2016-06-23	0.09582	5.615	33.835	0
25	2016-05-28	mixed	2016-05-27	0.05467	3.663	9.977	2016-06-01	2016-06-04	0.13160	4.646	13.581	20	NA	2016-06-21	M	1	2016-06-24	0.0894	5.550	33.901	0
26	2016-05-28	Chironomus	2016-05-27	0.05140	3.700	10.332	2016-06-06	2016-06-09	0.12653	4.693	13.473	NA	2016-06-21	NA	NA	0	NA	NA	NA	NA	1
27	2016-05-28	mixed	NA	NA	NA	NA	2016-05-29	2016-06-02	0.16045	5.136	14.134	21	NA	2016-06-19	M	1	2016-06-22	0.10236	5.883	34.619	0
28	2016-05-28	Daphnia	NA	NA	NA	NA	2016-05-29	2016-06-02	0.14681	4.854	14.051	21	NA	2016-06-19	F	1	2016-06-22	0.0876	5.659	36.199	0
29	2016-05-28	Chironomus	2016-06-01	0.07015	3.848	10.708	2016-06-08	2016-06-11	0.11787	4.705	13.668	28	NA	2016-07-06	M	0	2016-07-09	0.0728	NA	NA	0
30	2016-05-28	Daphnia	2016-06-02	0.06228	3.762	10.442	2016-06-06	2016-06-09	0.12874	4.960	13.701	18	2016-06-24	2016-06-24	NA	0	NA	NA	NA	NA	1
31	2016-05-28	mixed	2016-05-27	0.05837	3.718	10.523	2016-05-31	2016-06-03	0.12688	4.832	13.244	20	2016-06-21	2016-06-20	NA	0	NA	NA	NA	NA	1
32	2016-05-28	mixed	2016-05-27	0.05566	3.936	10.509	2016-06-05	2016-06-08	0.13844	4.982	13.859	21	NA	2016-06-26	M	1	2016-06-28	0.093	NA	NA	0
33	2016-05-28	Daphnia	2016-05-27	0.05685	3.715	10.149	2016-06-01	2016-06-04	0.12460	4.669	13.316	26	2016-06-27	2016-06-27	NA	0	NA	NA	NA	NA	1
34	2016-05-28	Chironomus	2016-05-27	0.05570	3.786	9.944	2016-06-04	2016-06-07	0.12782	4.737	13.391	NA	2016-06-30	NA	NA	0	NA	NA	NA	NA	1
35	2016-05-28	mixed	NA	NA	NA	NA	2016-05-29	2016-06-02	0.12944	4.770	13.487	19	NA	2016-06-17	M	1	2016-06-20	0.09413	5.482	33.504	0
36	2016-05-28	Daphnia	2016-05-27	0.07208	3.823	11.031	2016-05-30	2016-06-02	0.13571	4.866	13.722	20	NA	2016-06-19	F	1	2016-06-22	0.0696	5.545	35.964	0
37	2016-05-28	mixed	2016-05-27	0.05388	3.842	10.414	2016-06-04	2016-06-07	0.13680	5.004	14.215	18	NA	2016-06-22	F	1	2016-06-26	0.09154	5.736	35.823	0
38	2016-05-28	Daphnia	2016-05-27	0.04930	3.821	10.525	2016-06-04	2016-06-07	0.15045	4.915	14.687	20	NA	2016-06-24	F	1	2016-06-27	0.08985	5.666	35.219	0
39	2016-05-28	Chironomus	2016-05-27	0.06254	3.908	10.865	2016-06-02	2016-06-05	0.14659	4.818	14.659	NA	2016-06-28	NA	NA	0	NA	NA	NA	NA	1
40	2016-05-28	Daphnia	2016-05-27	0.05876	3.985	10.059	2016-06-05	2016-06-08	0.15994	5.161	14.161	20	2016-06-26	2016-06-25	NA	0	NA	NA	NA	NA	1
41	2016-05-28	mixed	2016-05-27	0.06813	3.910	11.185	2016-06-01	2016-06-04	0.14865	4.939	14.370	19	NA	2016-06-20	M	1	2016-06-23	0.10076	5.814	35.597	0
42	2016-05-28	mixed	2016-05-27	0.07228	3.842	11.220	2016-06-02	2016-06-05	0.14960	4.830	14.254	20	NA	2016-06-22	M	1	2016-06-26	0.09053	5.725	35.449	0
43	2016-05-28	Daphnia	2016-05-27	0.06228	3.865	11.103	2016-05-31	2016-06-03	0.13608	4.865	14.422	20	NA	2016-06-20	M	1	2016-06-23	0.08968	5.602	34.316	0
44	2016-05-28	Chironomus	2016-05-27	0.05005	3.818	10.532	2016-06-06	2016-06-09	0.13824	4.852	14.006	26	NA	2016-07-02	F	1	2016-07-05	0.09440	5.320	30.308	0
45	2016-05-28	Daphnia	2016-05-27	0.05653	3.929	11.040	2016-06-03	2016-06-06	0.14653	4.901	14.960	20	NA	2016-06-23	M	0	2016-06-28	0.09017	5.718	34.288	0
46	2016-05-28	mixed	2016-05-27	0.05343	3.783	10.649	2016-06-03	2016-06-06	0.13617	4.772	13.969	18	NA	2016-06-21	F	1	2016-06-24	0.09508	5.539	34.692	0
47	2016-05-28	Chironomus	2016-05-27	0.07057	3.951	11.394	2016-06-01	2016-06-04	0.14331	4.847	14.320	NA	2016-06-26	NA	NA	0	NA	NA	NA	NA	1
48	2016-05-28	mixed	2016-05-27	0.05724	3.760	10.199	2016-06-04	2016-06-07	0.14735	4.880	14.880	19	NA	2016-06-23	F	1	2016-06-28	0.09188	5.581	36.211	0
49	2016-06-02	mixed	2016-06-02	0.05837	3.747	10.319	2016-06-07	2016-06-10	0.14435	4.852	13.877	17	NA	2016-06-24	F	1	2016-06-27	0.09236	5.726	36.166	0
50	2016-05-31	Daphnia	NA	NA	NA	NA	2016-05-29	2016-06-02	0.06750	3.890	10.662	26	NA	2016-06-24	NA	0	2016-06-20	0.09376	5.748	36.480	0
51	2016-05-31	mixed	2016-06-03	0.05092	3.613	9.613	2016-06-09	2016-06-12	0.13801	4.777	14.180	18	NA	2016-06-27	M	1	2016-06-30	0.09418	5.580	33.772	0
52	2016-05-31	Daphnia	NA	NA	NA	NA	NA	2016-05-30	0.13488	4.858	13.881	NA	2016-06-17	NA	NA	0	NA	NA	NA	NA	1
53	2016-05-31	mixed	2016-06-02	0.06545	3.739	10.662	2016-06-07	2016-06-10	0.14840	4.812	14.853	18	NA	2016-06-25	F	1	NA	NA	NA	34.739	0
54	2016-05-31	Daphnia	2016-06-02	0.05860	3.729	10.032	2016-06-08	2016-06-11	0.13464	4.844	13.930	NA	2016-06-26	NA	NA	0	NA	NA	NA	NA	1
55	2016-05-31	Chironomus	2016-05-30	0.06754	3.816	11.117	2016-06-05	2016-06-08	0.15138	4.834	14.421	NA	2016-06-29	NA	NA	0	NA	NA	NA	NA	1
56	2016-05-31	mixed	2016-06-07	0.05992	3.705	10.483	2016-06-13	2016-06-17	0.14293	4.714	14.204	19	NA	2016-07-02	F	1	2016-07-05	0.08772	5.467	32.575	0
57	2016-05-31	Chironomus	2016-06-02	0.05452	3.620	10.205	2016-06-10	2016-06-13	0.10703	4.564	12.975	26	NA	2016-07-06	F	1	2016-07-10	0.07730	5.090	29.377	0
58	2016-05-31	mixed	NA	NA	NA	NA	2016-05-28	2016-06-01	0.16392	5.079	14.489	19	NA	2016-06-16	F	1	2016-06-20	0.09692	5.788	36.461	0
59	2016-05-31	Chironomus	2016-06-02	0.07814	3.805	11.296	2016-06-07	2016-06-10	0.12693	4.856	13.422	29	NA	2016-07-06	NA	0	NA	NA	NA	NA	0
60	2016-05-31	Daphnia	2016-05-30	0.05569	3.742	10.588	2016-06-05	2016-06-08	0.13699	4.622	13.737	19	2016-06-24	2016-06-24	NA	0	NA	NA	NA	NA	1
61	2016-05-31	Chironomus	NA	NA	NA	NA	2016-05-29	2016-06-02	0.12877	4.843	13.287	25	NA	2016-06-23	F	1	2016-06-28	0.07911	5.383	31.783	0
62	2016-05-31	mixed	NA	NA	NA	NA	2016-05-29	2016-06-02	0.16186	5.146	14.485	19	NA	2016-06-17	M	1	2016-06-20	0.10425	5.463	34.840	0
63	2016-05-31	Chironomus	NA	NA	NA	NA	2016-05-28	2016-06-01	0.14865	4.931	13.782	NA	2016-06-26	NA	NA	0	NA	NA	NA	NA	1
64	2016-05-31	Daphnia	NA	NA	NA	NA	2016-05-28	2016-06-01	0.14600	4.912	13.936	20	NA	2016-06-17	F	1	2016-06-20	0.09566	5.576	33.832	0
65	2016-05-28	Daphnia	NA	NA	NA	NA	NA	2016-06-02	0.15140	4.393	5.030	NA	NA	2016-06-17	F	1	2016-06-20	0.09376	5.748	36.480	0
66	2016-06-02	Chironomus	2016-06-02	0.06519	3.968	10.975	2016-06-07	2016-06-10	0.12288	4.938	13.417	33	2016-07-10	2016-07-10	NA	0	NA	NA	NA	NA	1
